# Supplementary material for: Efficient and selective extraction of oleanolic acid from grape pomace with dimethyl carbonate
Source: Royal Society of Chemistry journal article supplement (doi:10.1039/d4gc03624g), 2024-01-01
Supplement: d4gc03624g2.pdf [file d4gc03624g2.pdf]

## **SUPPORTING MATERIAL**

### **Efficient and selective extraction of oleanolic acid from grape pomace with dimethyl carbonate**

Francesco Errichiello<sup>a</sup>, Raffaele Cucciniello<sup>b\*</sup>, Michele Tomasini<sup>b</sup>, Laura Falivene<sup>b</sup>, Angelita Gambuti<sup>a</sup>, Chiara Cassiano<sup>c</sup>, Martino Forino<sup>a</sup>

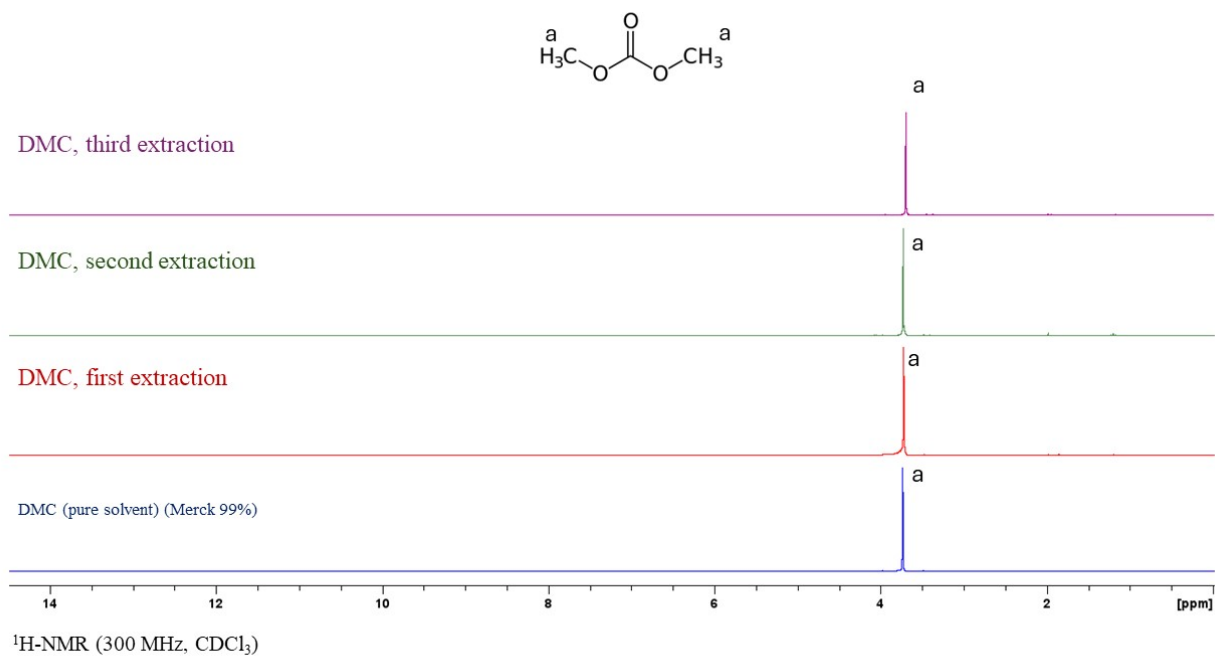

**Figure S1.** <sup>1</sup>H spectra of pure DMC and after three consecutive extraction cycles.

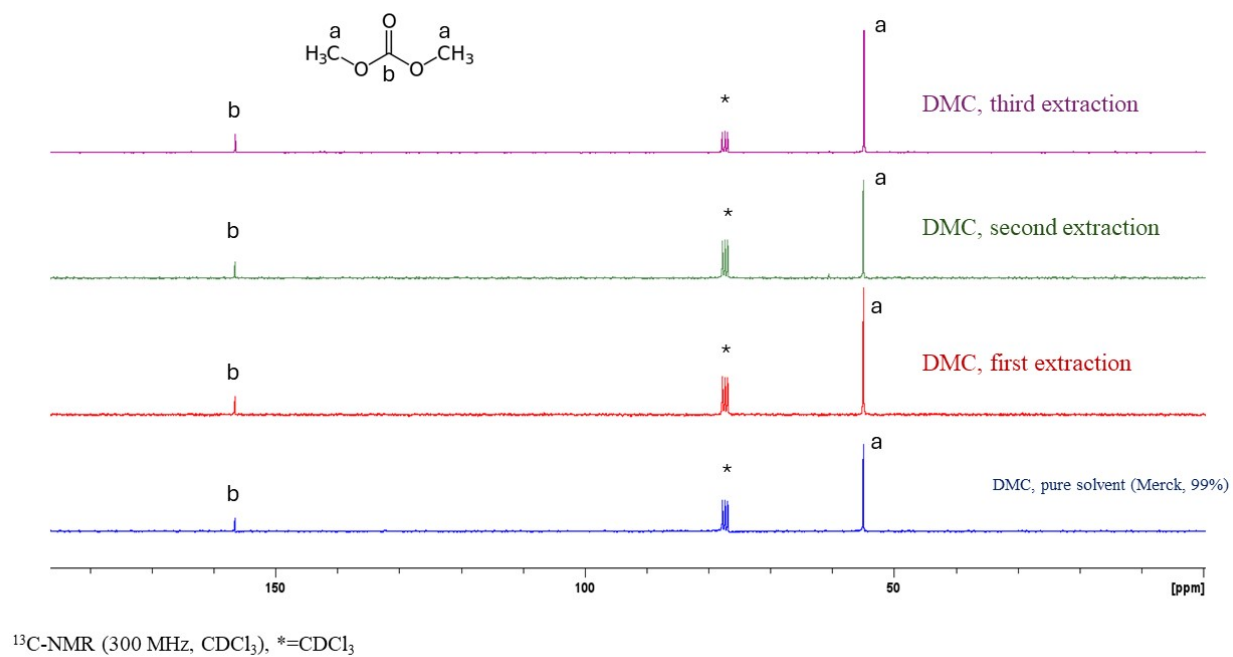

**Figure S2.** <sup>13</sup>C-NMR spectra of pure DMC and after three consecutive extraction cycles.

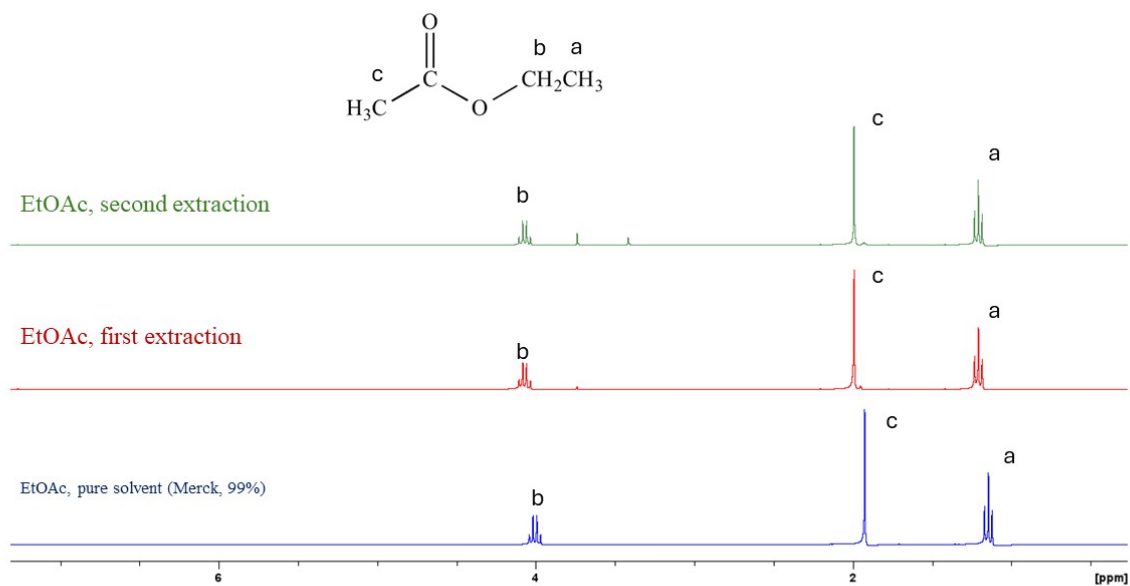

$^1\text{H-NMR}$  (300 MHz,  $\text{CDCl}_3$ )

**Figure S3.**  $^1\text{H}$  spectra of pure EtOAc and after two consecutive extraction cycles.

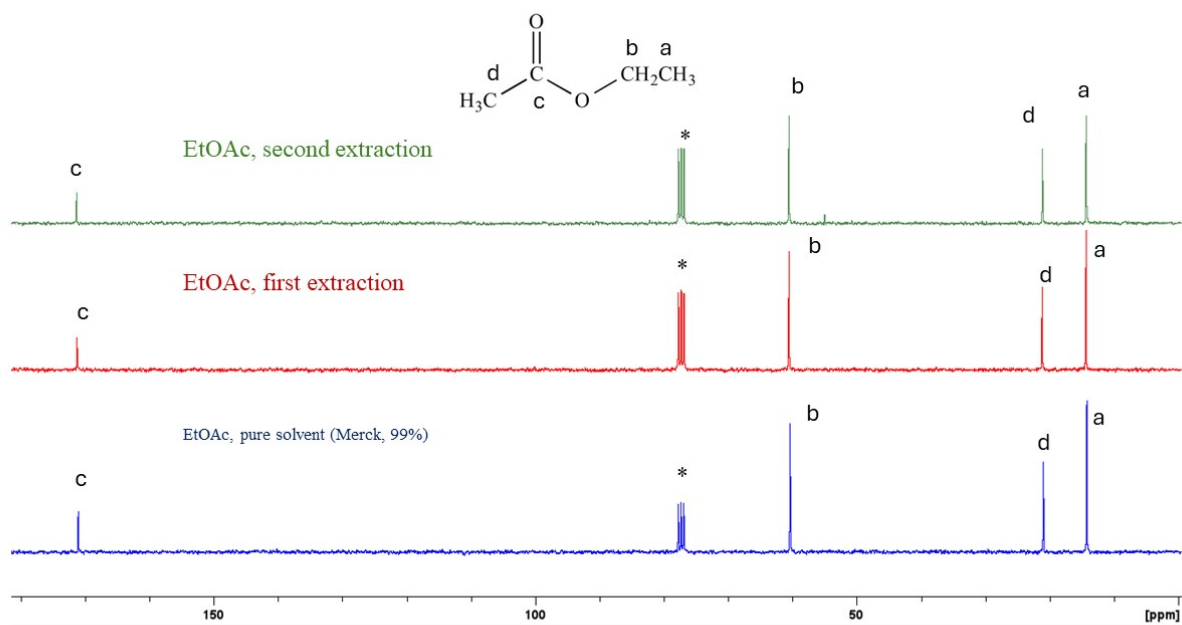

$^{13}\text{C-NMR}$  (300 MHz,  $\text{CDCl}_3$ ), \* =  $\text{CDCl}_3$

**Figure S4.**  $^{13}\text{C}$  spectra of pure EtOAc and after two consecutive extraction cycles.
